# Supplementary material
Source: Research Square preprint supplement (doi:10.21203/rs.3.rs-8917468/v1)
Supplement: Supplementary file 1 [file 441feee5ddc7f1081db81202.docx]

**Supplementary Material**

***Note****: Tables and figures are displayed in order of appearance in the manuscript*

**Table 1**. *Baseline characteristics of patients attending the epilepsy clinic, stratified by seizure-free status*

|  | **Not seizure free**  **(n=1217)** | **Seizure free**  **(n=392)** |
| --- | --- | --- |
| **Age**, mean (+/-SD) | 39.9 (15.1) | 42.7 (17.2) |
| **Female**, n (%) | 651 (53.1%) | 203 (51.8%) |
| **Seizure type**, n (%)  Focal  Generalised  Other | 789 (64.8%)  324 (26.6%)  104 (8.5%) | 247 (63.0%)  105 (26.8%)  40 (10.2%) |
| **Ethnicity**, n (%)  White  Black  Asian  Mixed  Others | 1008 (82.8%)  19 (1.6%)  85 (7.0%))  14 (1.2%)  91 (7.5%) | 322 (82.1%)  4 (1.0%)  18 (4.6%)  8 (2.0%)  40 (10.2%) |
| **Index of Multiple Deprivation**, n (%)  1 (Most deprived)  2  3  4  5 (Least deprived) | 510 (41.9%)  279 (22.9%)  163 (13.4%)  140 (11.5%)  125 (10.3%) | 153 (39.0%)  80 (20.4%)  50 (12.8%)  59 (15.1%)  50 (12.8%) |
| **Aetiology**, n (%)  Genetic  Tumour  Autoimmune  Hippocampal Sclerosis  Vascular Lesion  Trauma  Stroke  Cortical malformation  Structural  Metabolic  Others | 109 (9.0%)  63 (5.2%)  23 (1.9%)  65 (5.3%)  44 (3.6%)  29 (2.4%)  33 (2.7%)  77 (6.3%)  11 (0.9%)  2 (0.2%)  761 (62.5%) | 43 (11.0%)  38 (9.7%)  9 (2.3%)  22 (5.6%)  15 (3.8%)  11 (2.8%)  7 (1.8%)  18 (4.6%)  1 (0.3%)  1 (0.3%)  227 (57.9%) |

**Figure 1**. *Cross-correlation heatmap of all 24 features*


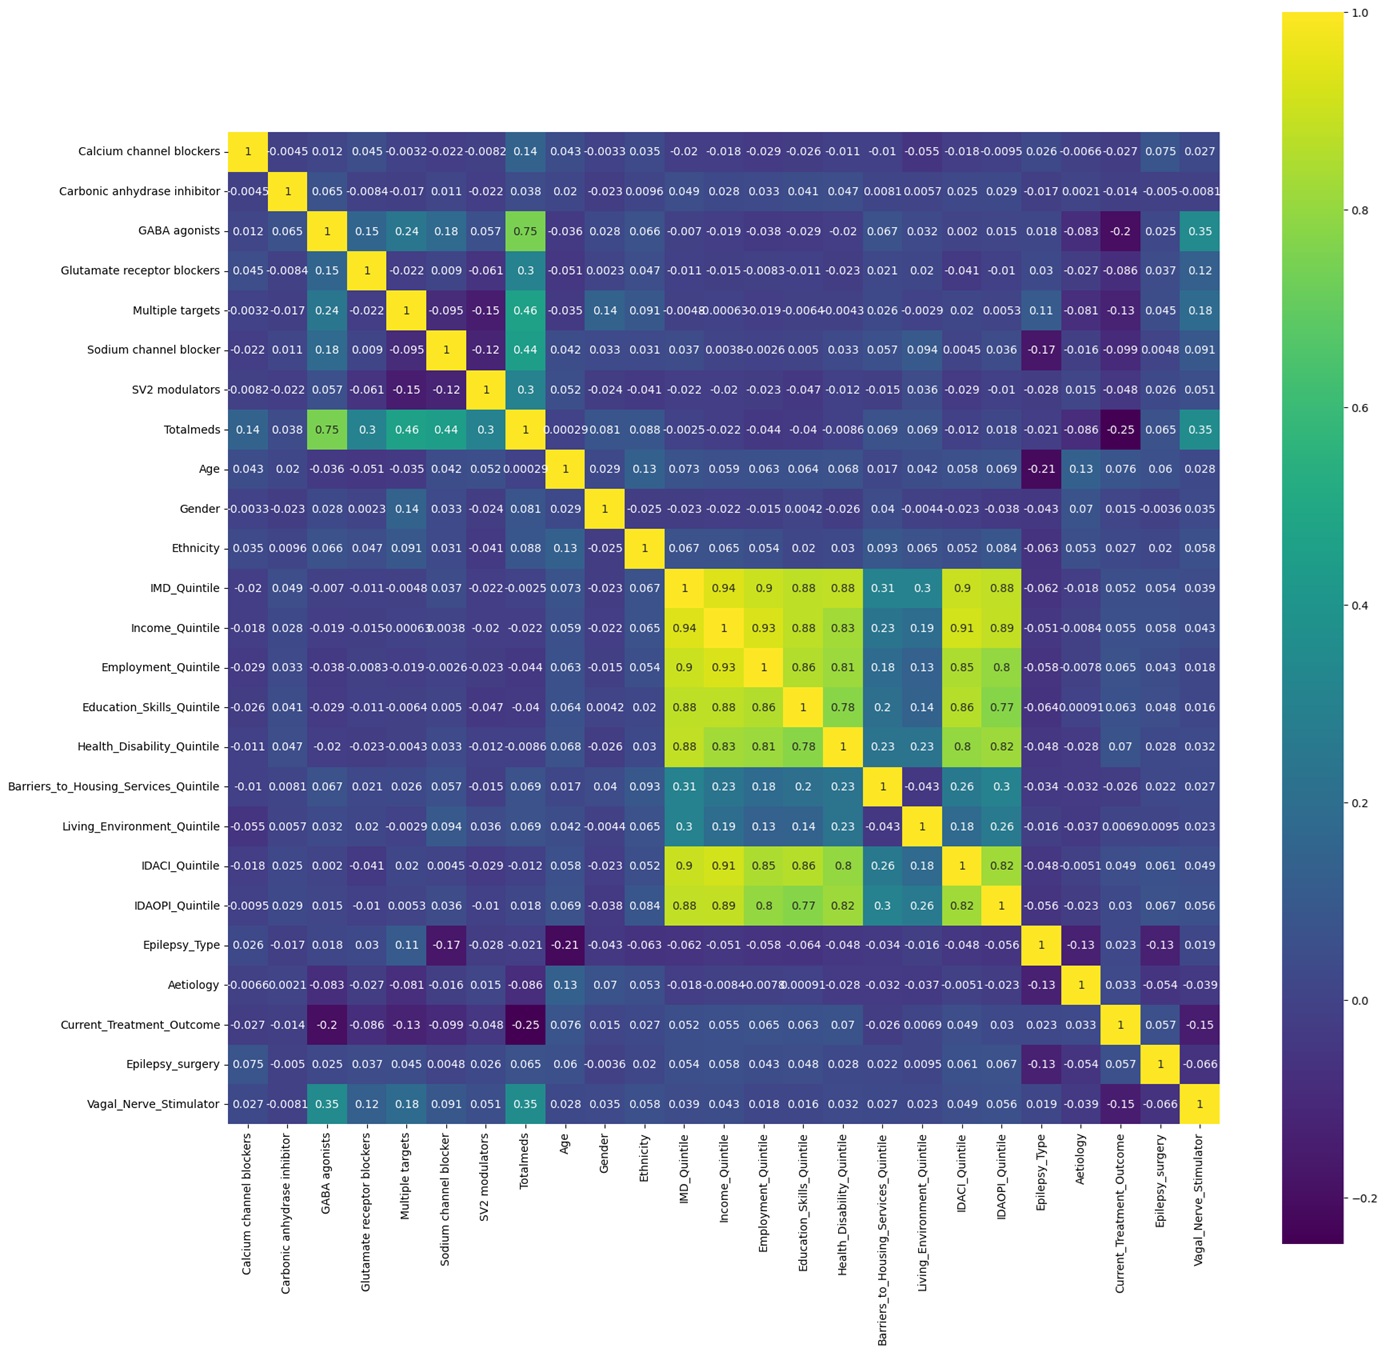


**Figure 2**. *Correlation value against target variable (epilepsy treatment outcome)*


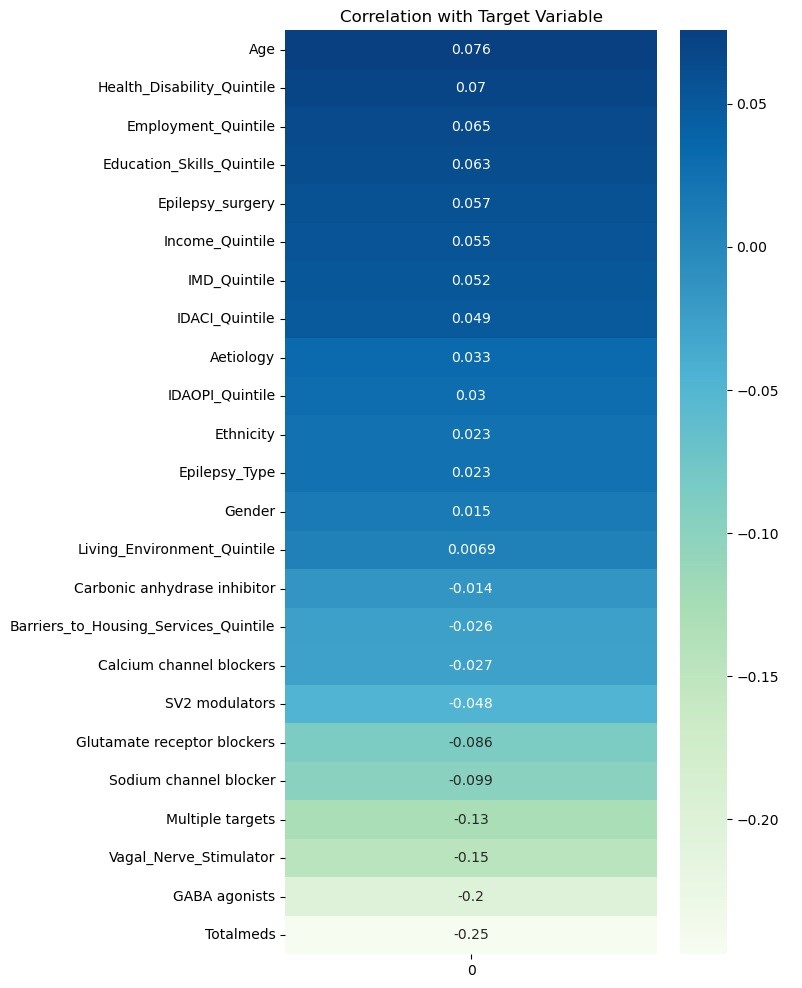


**Figure 3.** *Feature importance ranking using Chi² univariate testing*


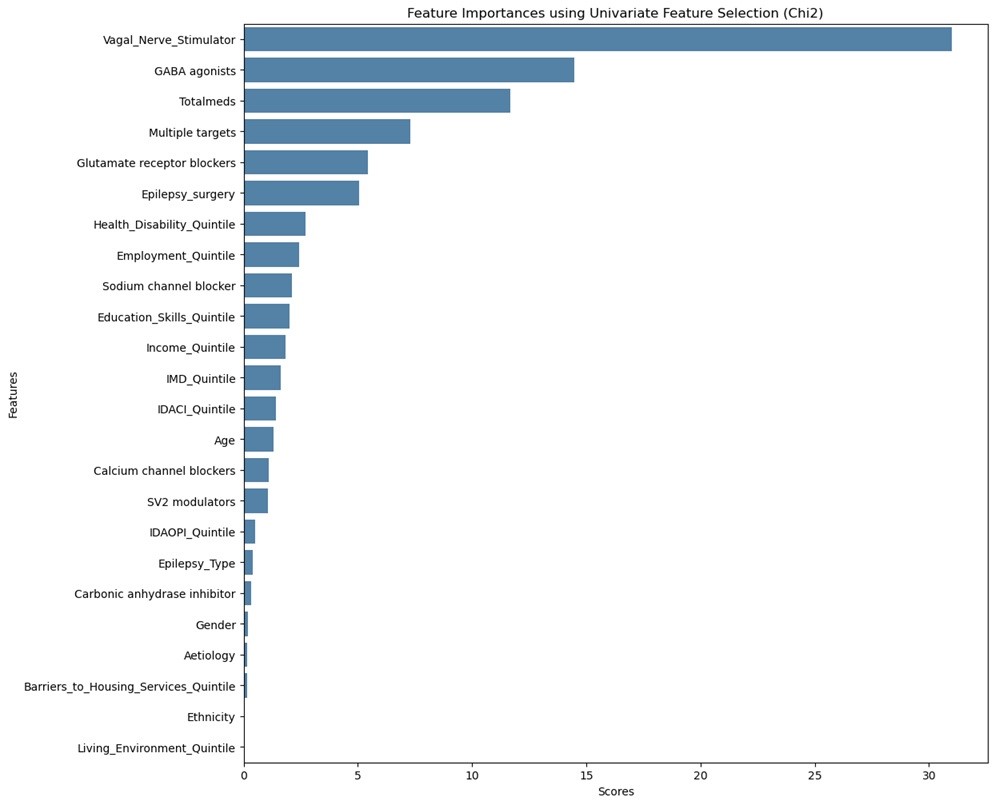


**Figure 4.** *Feature contribution towards model prediction using random forest model*


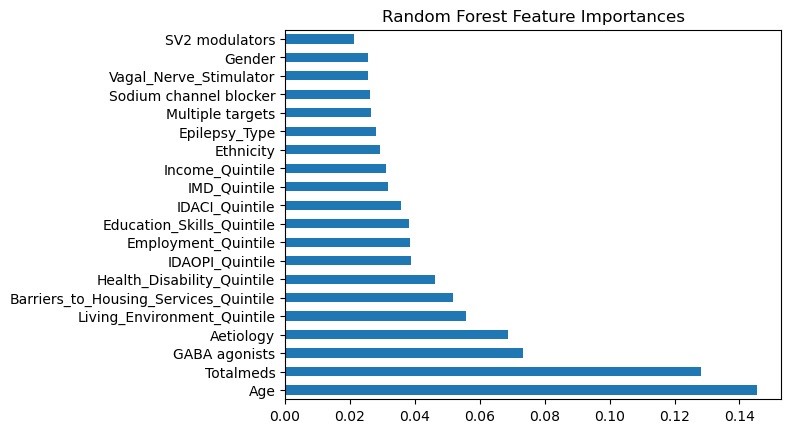


**Table 2**. *Model performance for approach one with all predictor variables*

| Model | Mean Accuracy | Mean Precision | Mean Recall | Hyperparameter |
| --- | --- | --- | --- | --- |
| Logistic regression | 75.6% | 71.6% | 75.6% | {'C': 0.216, 'multi_class': 'ovr', 'penalty': 'l2', 'solver': 'newton-cg'} |
| Random Forest | 75.6% | 70.6% | 75.6% | {'n_estimators': 1000, 'min_samples_split': 5, 'min_samples_leaf': 4, 'max_features': 'auto', 'max_depth': 40, 'criterion': 'gini', 'bootstrap': False} |
| Gradient Boosting | 75.0% | 70.0% | 75.0% | {'n_estimators': 50, 'max_depth': 3, 'loss': 'log_loss', 'learning_rate': 0.178, 'criterion': 'squared_error'} |

**Table 3**. *Model performance for approach one with demographic predictor variables only*

| Model | Mean Accuracy | Mean Precision | Mean Recall | Hyperparameter |
| --- | --- | --- | --- | --- |
| Logistic regression | 75.6% | 57.2% | 75.6% | {'C': 1.57, 'multi_class': 'ovr', 'penalty': 'l2', 'solver': 'newton-cg'} |
| Random Forest | 75.9% | 72.3% | 75.9% | {'n_estimators': 833, 'min_samples_split': 10, 'min_samples_leaf': 4, 'max_features': 'sqrt', 'max_depth': 80, 'criterion': 'gini', 'bootstrap': False} |
| Gradient Boosting | 74.8% | 67.4% | 74.8% | {'n_estimators': 50, 'max_depth': 3, 'loss': 'log_loss', 'learning_rate': 0.178, 'criterion': 'squared_error'} |

**Table 4**. *Model performance for approach two with smote and demographic predictor variables only*

| Model | Mean Accuracy | Mean Precision | Mean Recall | Hyperparameter |
| --- | --- | --- | --- | --- |
| Logistic regression | 66.0% | 67.0% | 66.0% | {'C': 0.065, 'multi_class': 'ovr', 'solver': 'sag'} |
| Random Forest | 84.0% | 84.0% | 84.0% | {'n_estimators': 777, 'min_samples_split': 2, 'min_samples_leaf': 1, 'max_features': 'sqrt', 'max_depth': 60, 'criterion': 'gini', 'bootstrap': True} |
| Gradient Boosting | 83.0% | 83.0% | 82.0% | {'n_estimators': 100, 'max_depth': 5, 'loss': 'log_loss', 'learning_rate': 0.094, 'criterion': 'squared_error'} |

**Figure 5.** *Precision-recall curve of the three models for each fold when the original dataset is used*


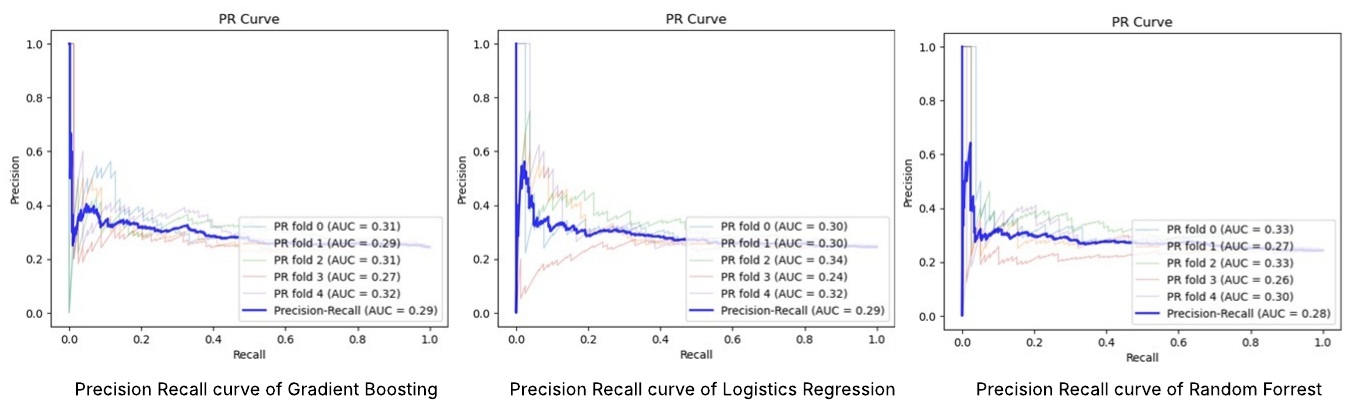


**Figure 6.** *Precision-recall curve of the three models for each fold when smote is used to balance the dataset*


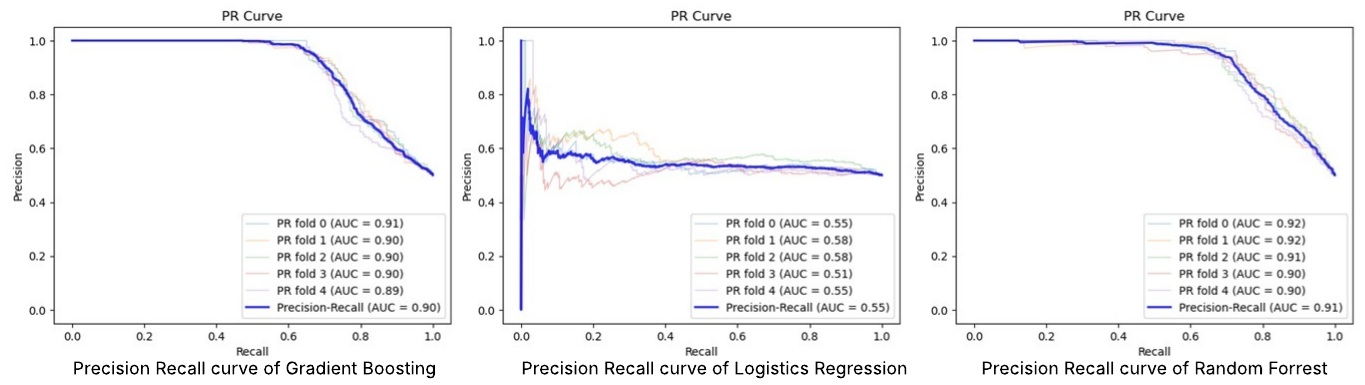


**APPENDIX 1**

# Create a dictionary to map the old ethnicity categories to the new ones

ethnicity_mapping = {

    "WHITE BRITISH": "White",

    "WHITE IRISH": "White",

    "ANY OTHER WHITE BACKGROUND": "White",

    "PAKISTANI (ASIAN OR ASIAN BRITISH)": "Asian",

    "ANY OTHER ASIAN BACKGROUND": "Asian",

    "INDIAN (ASIAN OR ASIAN BRITISH)": "Asian",

    "BANGLADESHI (ASIAN OR ASIAN BRITISH)": "Asian",

    "AFRICAN (BLACK OR BLACK BRITISH)": "Black",

    "ANY OTHER BLACK BACKGROUND": "Black",

    "CARIBBEAN (BLACK OR BLACK BRITISH)": "Black",

    "WHITE AND BLACK CARIBBEAN (MIXED)": "Mixed",

    "WHITE AND BLACK AFRICAN (MIXED)": "Mixed",

    "ANY OTHER MIXED BACKGROUND": "Mixed",

    "WHITE AND ASIAN (MIXED)": "Mixed",

    "CHINESE (OTHER ETHNIC GROUPS)": "Asian",

    "NOT STATED": "Others",

    "System Generated": "Others",

    "ANY OTHER ETHNIC GROUP": "Others",

}

# Create a dictionary to map the old epilepsy_type categories to the new ones

Epilepsy_Type_mapping = {

    "Other syndrome": "Other epilepsy",

    "Unclassified": "Other epilepsy",

    "Epilepsy syndrome with onset in childhood": "Other epilepsy",

    "Focal epilepsy": "Focal epilepsy",

    "Generalised epilepsy": "Generalised epilepsy",

    "Idiopathic Generalised Epilepsy Syndrome": "Generalised epilepsy",

    "Reflex epilepsy": "Other epilepsy",

    "Neonatal / Infantile Epilepsy Syndrome": "Other epilepsy",

}

Aetiology_mapping = {

    "Unknown": "Others",

    "Other": "Others",

}
